# Supplementary material for: Serotonin controls axon and neuronal regeneration in the nervous system: lessons from regenerating animal models
Source: PubMed Central journal article supplement — Neural Regen Res. 2018 Feb;13(2):237–8. doi: 10.4103/1673-5374.226387 (PMC5879892; doi:10.4103/1673-5374.226387), 2018-02
Supplement: NRR-13-237_Suppl1.pdf [file NRR-13-237_Suppl1.pdf]

Additional Table 1 Studies looking at the role of 5-HT in nervous system regeneration in regenerating species.

| Treatment               | Main activity                             | Other activities                                    | Lesion type                      | Species                       | Model system    | Neuronal type                                                                         | Effect                              | Reference                                 |
|-------------------------|-------------------------------------------|-----------------------------------------------------|----------------------------------|-------------------------------|-----------------|---------------------------------------------------------------------------------------|-------------------------------------|-------------------------------------------|
| Mutant <i>mg280</i>     | Loss-of-function mutation of <i>tph-1</i> |                                                     | Axotomy by laser surgery         | <i>Caenorhabditis elegans</i> | <i>In vivo</i>  | GABA releasing D-type neurons and touch sensory posterior lateral microtubule neurons | Inhibited axon regeneration         | Alam et al. (2016)                        |
| Mutant <i>tr4622</i>    | Mutation of <i>tph-1</i>                  |                                                     | Axotomy by laser surgery         | <i>Caenorhabditis elegans</i> | <i>In vivo</i>  | GABA releasing D-type neurons and touch sensory posterior lateral microtubule neurons | Inhibited axon regeneration         | Alam et al. (2016)                        |
| Mutant <i>tm1325</i>    | Mutation of 5-HT7                         |                                                     | Axotomy by laser surgery         | <i>Caenorhabditis elegans</i> | <i>In vivo</i>  | GABA releasing D-type neurons and touch sensory posterior lateral microtubule neurons | Inhibited axon regeneration         | Alam et al. (2016)                        |
| Mutant <i>tm1548</i>    | Mutation of 5-HT7                         |                                                     | Axotomy by laser surgery         | <i>Caenorhabditis elegans</i> | <i>In vivo</i>  | GABA releasing D-type neurons and touch sensory posterior lateral microtubule neurons | Inhibited axon regeneration         | Alam et al. (2016)                        |
| 5-HT                    | 5-HT receptors agonist                    |                                                     | Axotomy by laser surgery         | <i>Caenorhabditis elegans</i> | <i>In vivo</i>  | GABA releasing D-type neurons and touch sensory posterior lateral microtubule neurons | Promoted axon regeneration          | Alam et al. (2016)                        |
| 5-HT                    | 5-HT receptors agonist                    |                                                     | Crush injury                     | <i>Lymnaea stagnalis</i>      | <i>In vitro</i> | Serotonergic cerebral giant cells                                                     | Inhibited neurite growth            | Koert et al. (2001)                       |
| 5-HT                    | 5-HT receptors agonist                    |                                                     | Axotomy                          | <i>Helisoma trivolis</i>      | <i>Ex vivo</i>  | B19 and C1 neurons                                                                    | Inhibited neurite growth            | Murray et al. (1990)                      |
| 5-HT                    | 5-HT receptors agonist                    |                                                     | Optic nerve crush                | <i>Carassius auratus</i>      | <i>Ex vivo</i>  | Optic nerve                                                                           | Inhibited neurite growth            | Lima et al. (1994)                        |
| 5-Hydroxytryptophan     | 5-HT precursor                            |                                                     | Optic nerve crush                | <i>Carassius auratus</i>      | <i>Ex vivo</i>  | Optic nerve                                                                           | Inhibited neurite growth            | Lima et al. (1994, 1996)                  |
| Imipramine              | 5-HT reuptake inhibitor                   |                                                     | Optic nerve crush                | <i>Carassius auratus</i>      | <i>Ex vivo</i>  | Optic nerve                                                                           | Inhibited neurite growth            | Lima et al. (1994)                        |
| Citalopram              | 5-HT reuptake inhibitor                   |                                                     | Optic nerve crush                | <i>Carassius auratus</i>      | <i>Ex vivo</i>  | Optic nerve                                                                           | Inhibited neurite growth            | Lima et al. (1994)                        |
| Bupropion               | 5-HT1A agonist                            | D2 receptor antagonist                              | Optic nerve crush                | <i>Carassius auratus</i>      | <i>Ex vivo</i>  | Optic nerve                                                                           | Inhibited neurite growth            | Lima et al. (1994), Schmeer et al. (2001) |
| 8-OH-DPAT               | 5-HT1A agonist                            | 5-HT7 receptors agonist and 5-HT reuptake inhibitor | Optic nerve crush                | <i>Carassius auratus</i>      | <i>Ex vivo</i>  | Optic nerve                                                                           | Inhibited neurite growth            | Lima et al. (1994)                        |
| 5-HT-hydrochloride      | 5-HT analogue                             |                                                     | Complete spinal cord transection | <i>Danio rerio</i>            | <i>In vivo</i>  | Motor neurons                                                                         | Promoted motor neuron regeneration  | Barreiro-Iglesias et al. (2015)           |
| 5,7-Dihydroxytryptamine | Ablates serotonergic neurons/fibers       |                                                     | Complete spinal cord transection | <i>Danio rerio</i>            | <i>In vivo</i>  | Motor neurons                                                                         | Inhibited motor neuron regeneration | Barreiro-Iglesias et al. (2015)           |

Table showing the treatments (genetic or pharmacological) used by different authors to manipulate the serotonergic system in the context of nervous system regeneration in regenerating species. Invertebrate species are highlighted in red. GABA: Gamma-aminobutyric acid; 5-HT: serotonin; 8-OH-DPAT: 8-hydroxy-2-(di-n-propylamino)tetralin; 5-HT1A: serotonin receptor 1A; 5-HT7: serotonin receptor 7; D2: dopamine receptor 2; *tph*: tryptophan hydroxylase.
